# Supplementary material for: The Atlantic Ocean's Decadal Variability in mid-Holocene Simulations using Shannon's Entropy
Source: Copernicus journal article supplement (doi:10.5194/egusphere-2025-921), 2025-05-27
Supplement: Supplementary file 1 [file egusphere-2025-921-supplement.pdf]

# Supplementary Material - The Atlantic Ocean's Variability in mid-Holocene Simulations

Iuri Gorenstein<sup>1</sup>, Ilana Wainer<sup>1</sup>, Francesco S. R. Pausata<sup>2</sup>, Luciana F. Prado<sup>3</sup>, Pedro L. Silva Dias<sup>4</sup>, Allegra N. LeGrande<sup>5</sup>, Clay R. Tabor<sup>6</sup>, and W. Richard Peltier<sup>7</sup>

<sup>1</sup>Departamento de Oceanografia Física, São Paulo, SP, Brazil

<sup>2</sup>Centre ESCER (Etude et la Simulation du Climat à l'Echelle Regionale) and GEOTOP (Research Center on the Dynamics of the Earth System), Department of Earth and Atmospheric Sciences, University of Quebec, Montreal, Montreal, QC, Canada

<sup>3</sup>Faculdade de Oceanografia, Universidade do Estado do Rio de Janeiro, Rio de Janeiro, Brazil

<sup>4</sup>Instituto de Astronomia, Geofísica e Ciências Atmosféricas, Universidade de São Paulo, Departamento de Ciências Atmosféricas, São Paulo, Brazil

<sup>5</sup>NASA Goddard Institute for Space Studies, and Center for Climate Systems Research, Columbia University, New York, USA

<sup>6</sup>Department of Geosciences, University of Connecticut, USA

<sup>7</sup>Department of Physics, University of Toronto, Canada

**Correspondence:** Iuri Gorenstein (iuri.gorenstein@usp.br)

**Figure S1. Possible states for SST and precipitation**

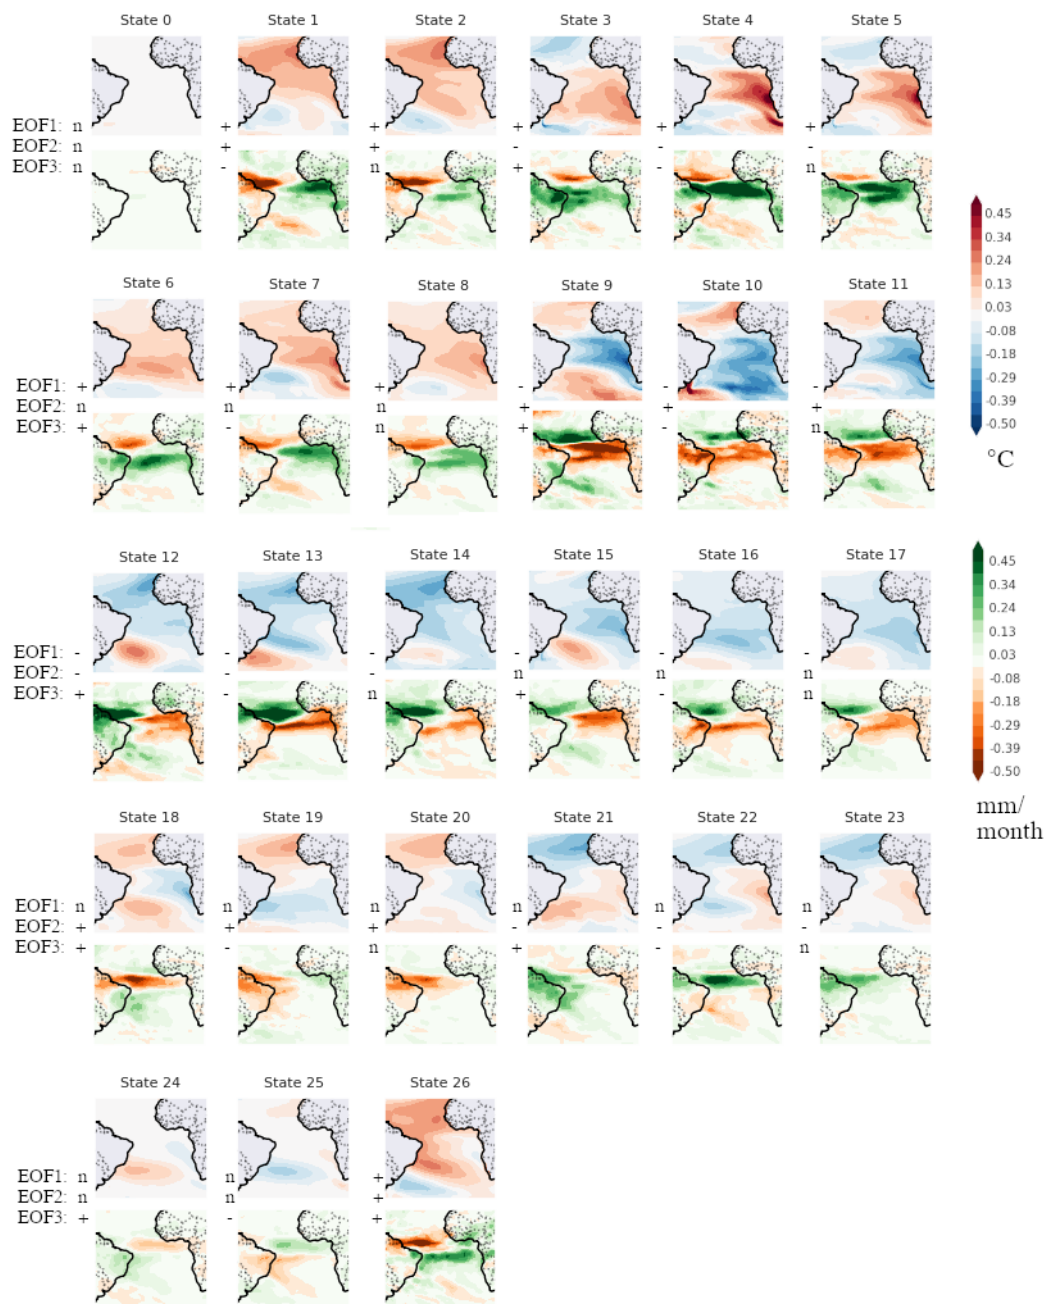

**Figure S1.** Each state is a decadal SST (top) and precipitation (bottom) anomaly pattern from the Tropical and South Atlantic Ocean region. From states 0 to 26, these states are retrieved from the principal component analysis of the two variables, and each state is a combination of negative (-), positive (+), or neutral (n) phases of the respective principal components (EOF1, EOF2 and EOF3). SST color bar in Celsius: Blue indicating negative SST anomalies and red for positive. Precipitation color bar in mm/month: Orange indicating negative precipitation anomalies and green for positive.

**Figure S2. Entropy per SST principal component threshold**

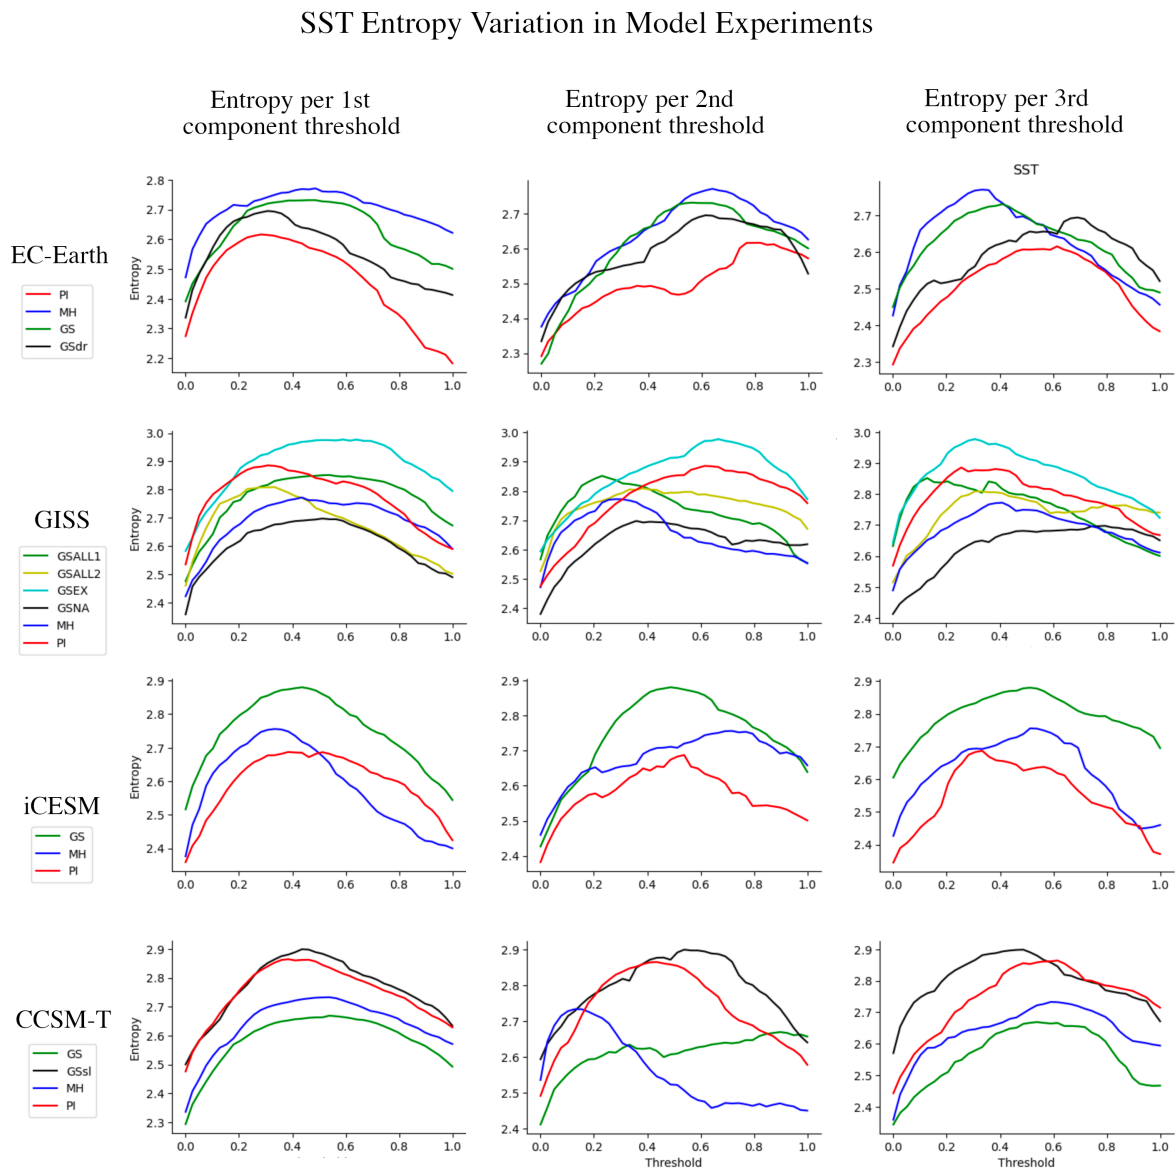

**Figure S2.** SST entropy values for each model scenario with different thresholds. The y-axis is the Entropy value, calculated from equation 1. The x-axis is the threshold used to define the positive, negative and neutral phases of the three main componets (a.k.a possible states) in the PCs' space. At each column, the thresholds from two of the main components are maintained fixed at 0.5, while the remaining component threshold varies. From left to right: the first, second and third components thresholds are varied. From top to bottom, the model runs are: EC-Earth - Pre-Industrial (PI, red), mid-Holocene ( $MH_{PMIP}$ , blue), Green Sahara ( $MH_{GS}$ , green), and Grenn Sahara with dust reduction ( $MH_{GSrd}$ , black); GISS - Full vegetation ( $MH_{GSALL1}$ , green;  $MH_{GSALL2}$  yellow), Extra-tropical vegetation ( $MH_{GSEX}$ , cyan), North Africa vegetation only ( $MH_{GSNA}$ , black),  $MH_{PMIP}$  (blue) and PI (red); iCESM -  $MH_{GS}$  (green),  $MH_{PMIP}$  (blue) and PI (red); CCSM-T -  $MH_{GS}$  (green), GS with soil and lake inputs ( $MH_{GSsl}$ , black),  $MH_{PMIP}$  (blue) and PI (red)

**Figure S3. Entropy per precipitation principal component threshold**

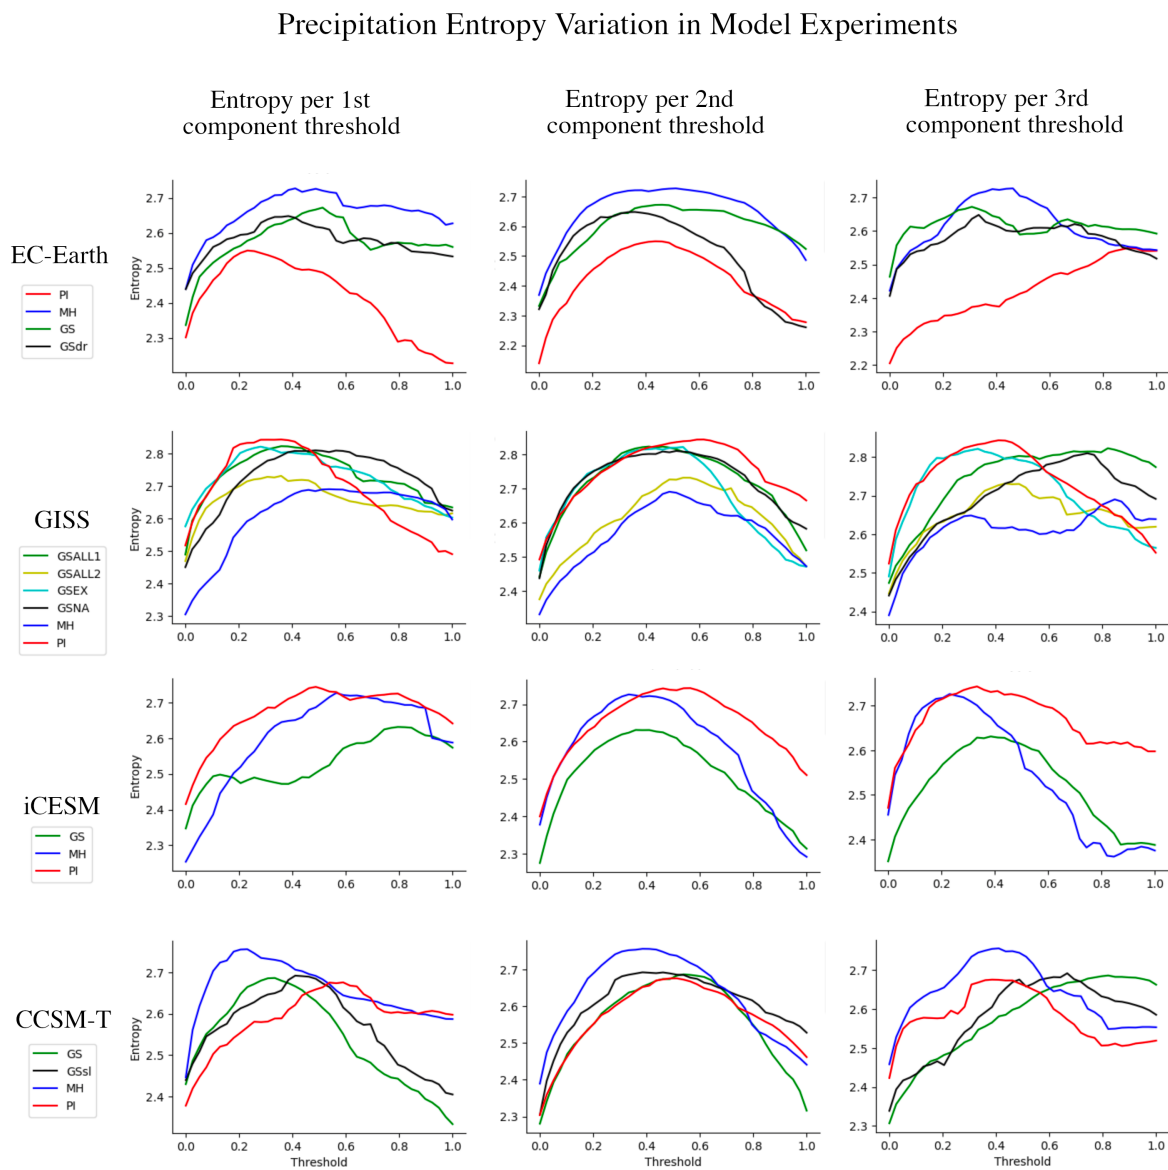

**Figure S3.** Precipitation entropy values for each model scenario with different thresholds. The y-axis is the Entropy value, calculated from equation 1. The x-axis is the threshold used to define the positive, negative and neutral phases of the three main componets (a.k.a possible states) in the PCs' space. At each column, the thresholds from two of the main components are maintained fixed at 0.5, while the remaining component threshold varies. From left to right: the first, second and third components thresholds are varied. From top to bottom, the model runs are: EC-Earth - Pre-Industrial (PI, red), mid-Holocene ( $MH_{PMIP}$ , blue), Green Sahara ( $MH_{GS}$ , green), and Grenn Sahara with dust reduction ( $MH_{GSrd}$ , black); GISS - Full vegetation ( $MH_{GSALL1}$ , green;  $MH_{GSALL2}$  yellow), Extra-tropical vegetation ( $MH_{GSEX}$ , cyan), North Africa vegetation only ( $MH_{GSNA}$ , black),  $MH_{PMIP}$  (blue) and PI (red); iCESM -  $MH_{GS}$  (green),  $MH_{PMIP}$  (blue) and PI (red); CCSM-T -  $MH_{GS}$  (green), GS with soil and lake inputs ( $MH_{GSsl}$ , black),  $MH_{PMIP}$  (blue) and PI (red)
